# Supplementary material for: An aptamer-mediated base editing platform for simultaneous knockin and multiple gene knockout for allogeneic CAR-T cells generation
Source: PubMed Central journal article supplement — Mol Ther. 2024 Jun 26;32(8):2692–710. doi: 10.1016/j.ymthe.2024.06.033 (PMC11405993; doi:10.1016/j.ymthe.2024.06.033), 2024-06-26
Supplement: mmc1.pdf [file mmc1.pdf]

## **Supplemental Information**

### **An aptamer-mediated base editing platform for simultaneous knockin and multiple gene knockout for allogeneic CAR-T cells generation**

**Immacolata Porreca, Robert Blassberg, Jennifer Harbottle, Bronwyn Joubert, Olga Mielczarek, Jesse Stombaugh, Kevin Hemphill, Jonathan Sumner, Deividas Pazeraitis, Julia Liz Touza, Margherita Francescato, Mike Firth, Tommaso Selmi, Juan Carlos Collantes, Zaklina Strezoska, Benjamin Taylor, Shengkan Jin, Ceri M. Wiggins, Anja van Brabant Smith, and John J. Lambourne**

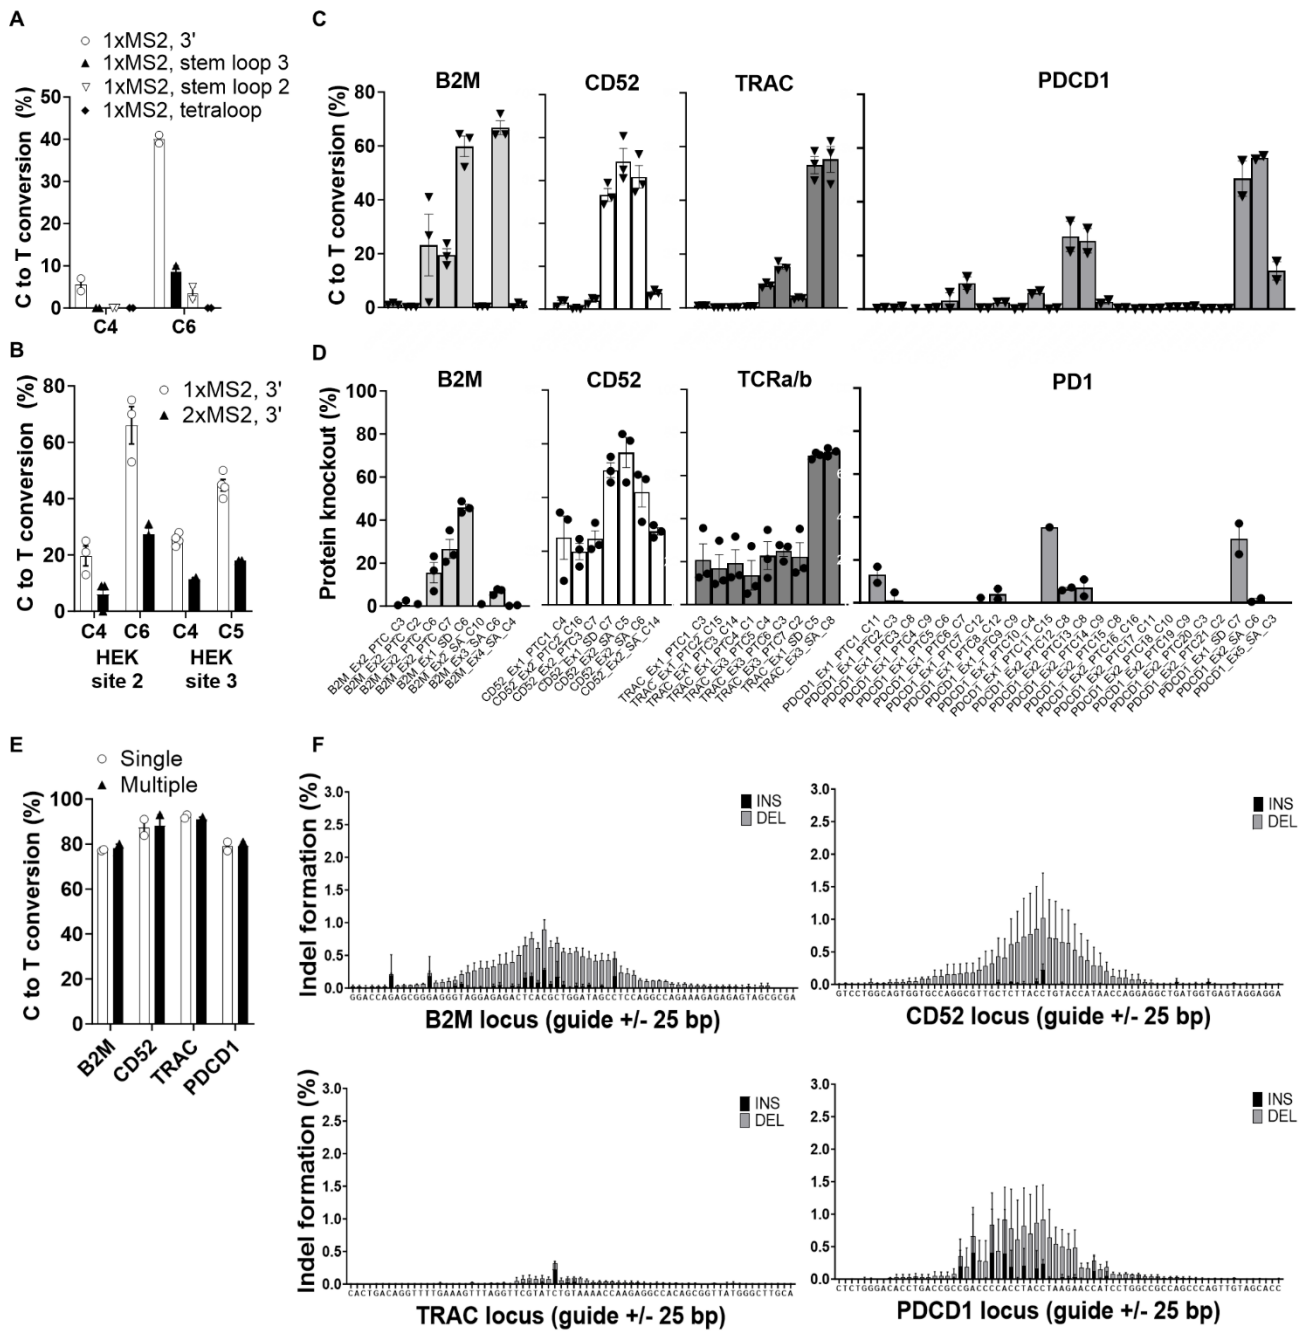

**Figure S1. Optimisation and validation of Pin-point platform guide RNAs.** Related to Figure 1. **A)** Activity of tracrRNAs incorporating one copy of the MS2 aptamer at either the 3' terminus or at different stem-loop positions within the gRNA scaffold. HEK293 cells were electroporated with mRNAs expressing the nCas9-UGI-UGI and rAPOBEC1-MCP components, and crRNA:tracrRNA complexes targeting site 2. Data is reported as mean (SEM) from one

individual experiment with three replicates. **B)** Activity of tracrRNAs incorporating one or two copies of the MS2 aptamer at the 3' terminus of the gRNA scaffold. HEK293T cells stably expressing the nCas9-UGI-UGI component were transfected with rAPOBEC1-MCP mRNA and crRNA:tracrRNA complexes targeting site 2 or site 3. Data are reported as mean (SEM) from one individual experiment with two replicates. In A) and B) editing was analyzed by Sanger sequencing three days post-electroporation. Activity for all the Cs in the editing windows is reported. **C)** C to T conversion of the target C for each of the gRNAs tested at *B2M*, *CD52*, *TRAC* and *PDCDI* gene targets. Individual crRNAs were delivered in combination with the tracrRNA containing one copy of the MS2 aptamer at the 3' end, nCas9-UGI-UGI mRNA, and rAPOBEC1-MCP mRNA to T cells by electroporation. Editing was analyzed by amplicon sequencing three days post electroporation. Data represented as mean (SEM), n = 3 independent T cell donors. **D)** Frequency of B2M, CD52, TCRa/b, and PD1 protein knock-out measured by flow cytometry three days after delivery of Pin-point mRNAs and crRNA/tracrRNA complexes targeting individual genes. Data represented as mean (SEM), n = 3 independent T cell donors. **E)** Comparison of C to T conversion of the target C following individual or combined delivery of optimal sgRNAs targeting *B2M*, *CD52*, *TRAC* and *PDCDI* loci by Sanger sequencing seven days post electroporation. Data represented as mean (SEM), n = 2 independent T cell donors. **F)** Levels of insertions and deletions at *B2M*, *CD52*, *TRAC* and *PDCDI* loci following co-delivery of Pin-point mRNAs and four target sgRNAs analyzed by NGS seven days post electroporation. Data represented as mean (SD), n = 3 independent T cell donors.

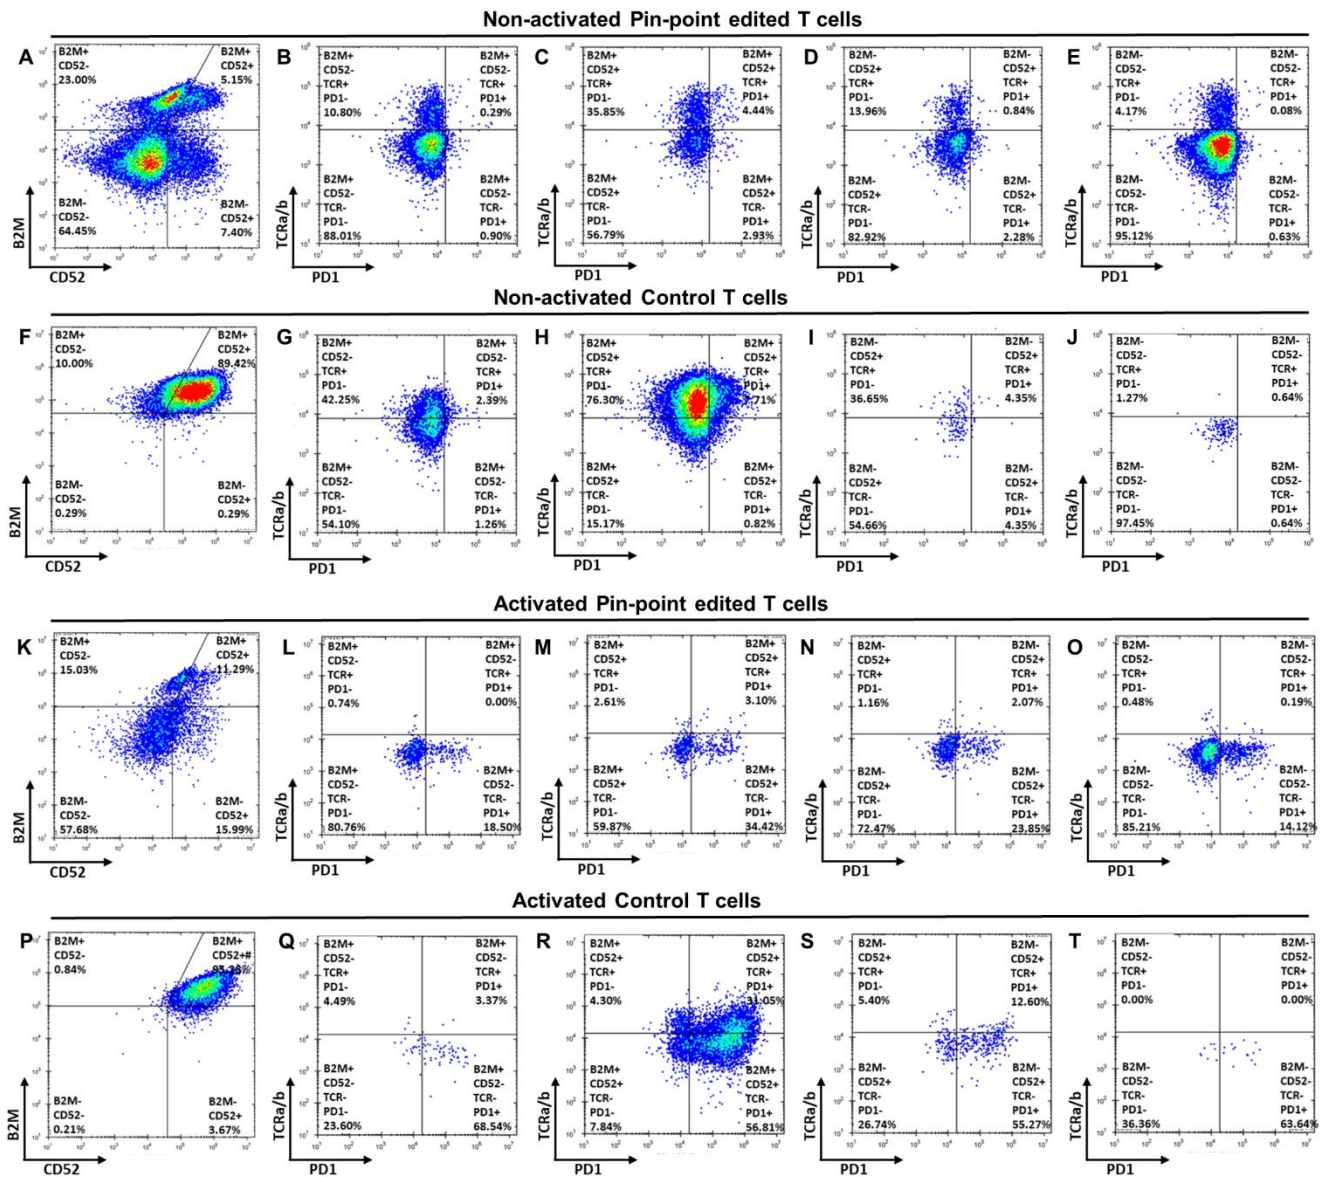

**Figure S2 Representative flow cytometry gating strategy for quadruple edited T cells.**

Related to Figure 2. A-E and K-O) Quadruple knockout edited cells. F-J and P to T) Unedited cells. A-J) Non-activated T cells. K-T) PMA/ionomycin stimulated cells. A, F, K and P) B2M and CD52 expression within the live population. B, G, L and Q) TCRa/b and PD1 expression within the B2M+ CD52- population. C, H, M and R) TCRa/b and PD1 expression within the B2M+

CD52+ population. D, I, N and S) TCRa/b and PD1 expression within the B2M- CD52+ population. E, J, O and T) TCRa/b and PD1 expression within the B2M- CD52- population.

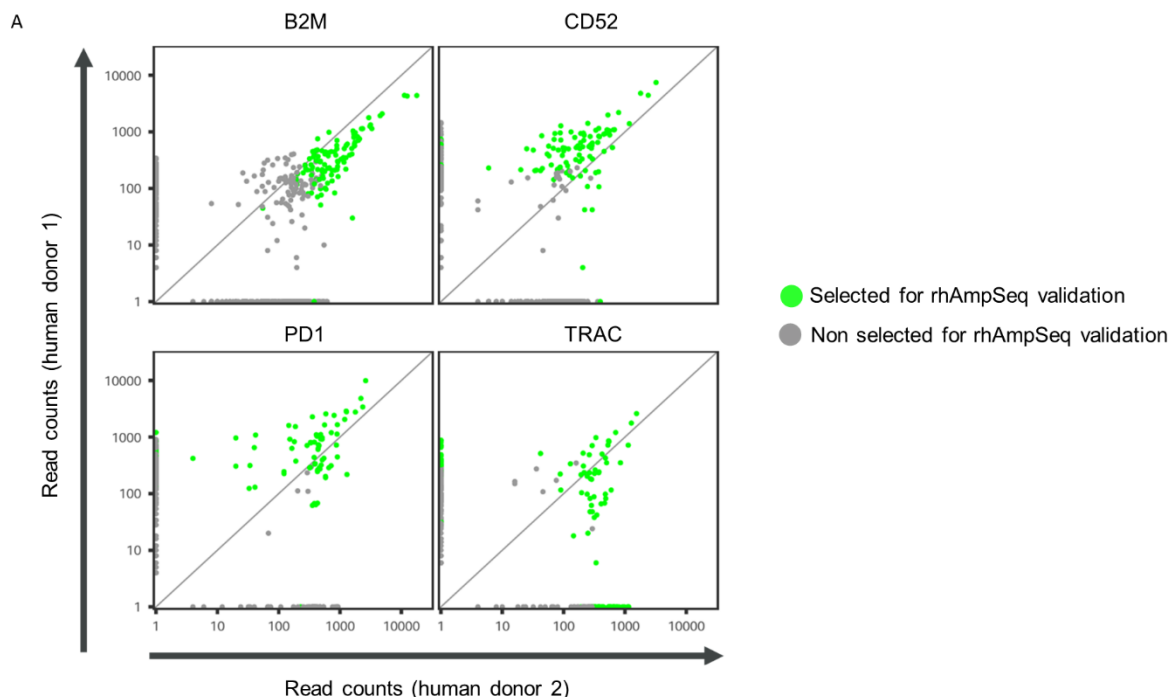

**B**

| Target site                | On/Off-target | Site Sequence         | PinPoint, % base editing (average) | Cas9, % indels (average) |
|----------------------------|---------------|-----------------------|------------------------------------|--------------------------|
| <b>B2M_Ex1_SD_C6 sgRNA</b> |               |                       |                                    |                          |
| B2M                        | On-target     | ACTCACGCTGGATAGCCTCC  | 40                                 | 47.3                     |
| chr12_64682768_64682791    | Off-target    | TCTCACAGCTGGATAGTCTCC | 0.93                               | 0.02                     |
| chr20_22332541_22332564    | Off-target    | ACTCACTGCTGGACAGCCTCC | 0.68                               | 1.18                     |
| <b>PDCD1_Ex1_SD_C7</b>     |               |                       |                                    |                          |
| PDCD1                      | On-target     | CACCTACCTAAGAACCATCC  | 41.3                               | 46.5                     |
| chr15_92446125_92446147    | Off-target    | ACCTGACCTAAGAACCATCC  | 2.2                                | 20.2                     |
| <b>TRAC_Ex3_SA_anti_C8</b> |               |                       |                                    |                          |
| TRAC                       | On-target     | TTCGTATCTGTAAACCAAG   | 56.4                               | 41.3                     |
| <b>CD52_Ex1_SD_anti_C7</b> |               |                       |                                    |                          |
| CD52                       | On-target     | CTCTTACCTGTACCATAACC  | 47.4                               | 52.7                     |
| chr10_79064348_79064370    | Off-target    | ACCTTATCTGCACCATAACC  | 0.75                               | 0.02                     |

**Figure S3 Nomination of CHANGE-seq predicted off-target sites for rhAmpSeq validation.**

Related to Figure 3. **A**) ~100 predicted off-target sites per target gene (B2M, CD52, PDCD1 and TRAC) were selected for rhAmpSeq validation based on the following hierarchal site selection criteria: i) sites present in both donors and all replicates, ii) sites in all replicates of one donor, iii) sites in at least two replicates of either donor, and iv) sites in at least one replicate from one donor. In cases where we had more than 100 predicted sites we prioritized based on the nuclease-read counts reported in y-axis for donor 1 and in x-axis for donor 2. Additionally, any predicted

site with up to 4 miss-matches discovered by CHANGE-seq was also taken forward for off-target validation by rhAMPSeq. See Table S2 for CHANGE-Seq data summary. **B)** Summary of rhAMPSeq confirmed off-target sites in primary human T cells. Mismatches to the on-target site are highlighted.

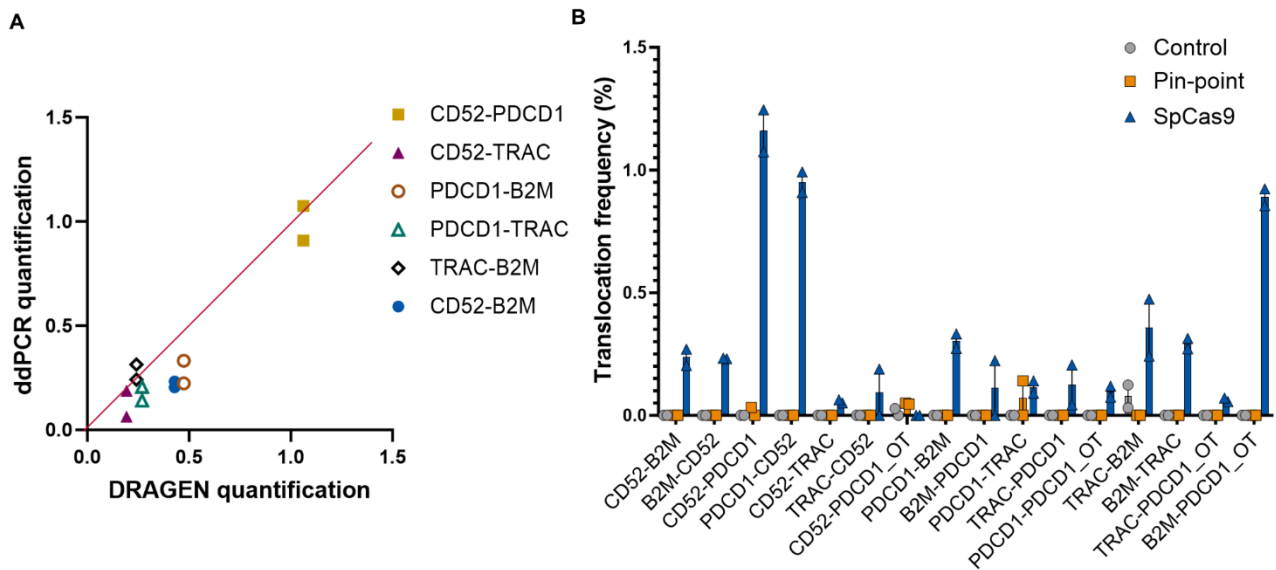

**Figure S4 ddPCR validation of translocations identified by Capture-seq.** Related to Figure 4.

**A)** Correlation of translocation frequencies between sgRNA target sites calculated from Capture-seq and ddPCR analysis of a single SpCas9 edited sample three days post electroporation. The ddPCR data points are quantifications of the two outcomes of a reciprocal translocation between two sgRNA targets. **B)** Individual frequencies of the two outcomes of each predicted reciprocal translocation quantified by ddPCR. Control is mock electroporated T cells without RNA. Samples were analyzed at three days post electroporation. Data are reported as mean (SEM), n=2 independent T-cell donors.



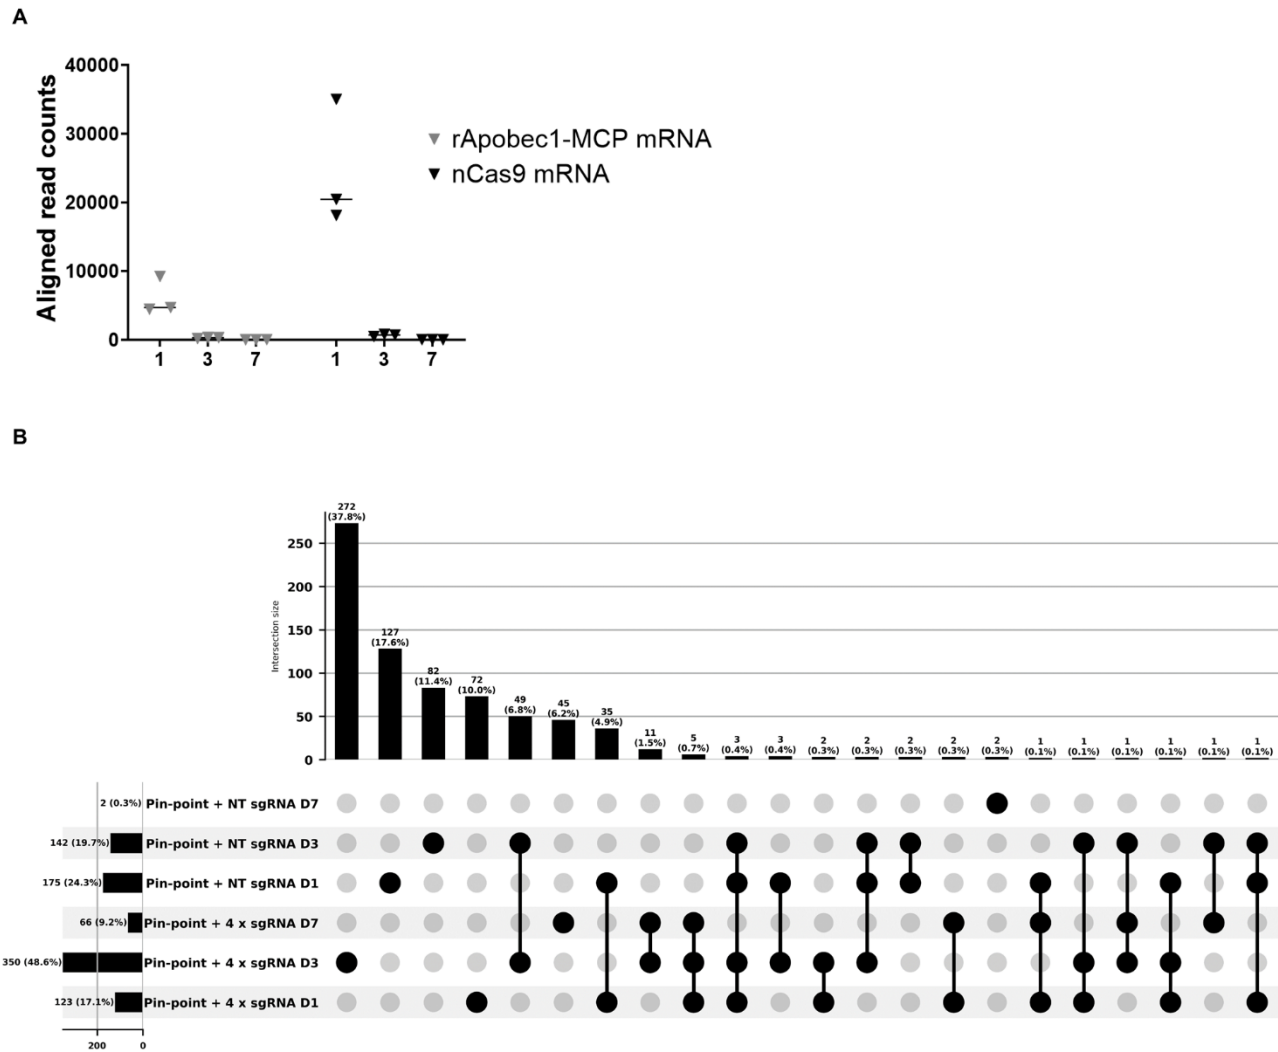

**Figure S5 Gene expression analysis.** Related to Figure 5. **A)** Reads aligned to the Pin-point mRNA sequences (nCas9-UGI-UGI and rAPOBEC-MCP) in RNA samples from T cells electroporated with Pin-point mRNAs and the four targeting sgRNAs (*TRAC*, *B2M*, *CD52*, *PDCD1*) at different time points post electroporation. Individual samples were run through the GATK Best Practice for RNA-Seq Pipeline, where instead of aligning against the transcriptome, reads are aligned against the reference sequences (i.e. rAPOBEC1-MCP or nCas9-UGI-UGI) corresponding to that sample. As a result, a filtered alignment file (in BAM-format) and Variant Call Format (VCF) file was generated for each sample. Using the BAM files, read counts were

determined for each component aligned against. **B)** UpSet plot of the differentially expressed genes (DEGs) of RNA-Seq. This panel summarizes the deregulated genes ( $p < 0.05$  and  $\log_2 FC \geq 1.5$ ) overlap between human T cells electroporated with Pin-point mRNAs and either a non-targeting (NT) sgRNA or the four targeting sgRNAs and analyzed at day 1, 3 and 7 post electroporation.

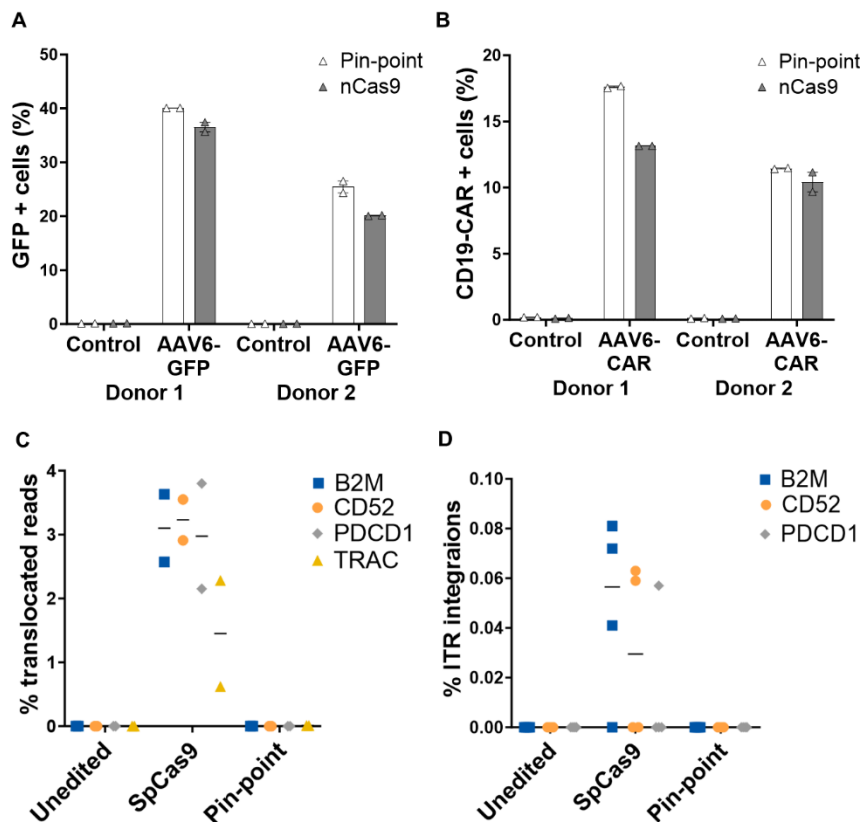

**Figure S6 Efficacy and safety of aptamer-less sgRNAs for locus specific knock-in.** Related to Figure 7. Pin-point mRNAs (nCas9-UGI-UGI and rAPOBEC1-MCP) or nCas9-UGI-UGI alone have been co-delivered with 2 aptamer-less gRNAs designed to target the exon 1 of TRAC locus. Shortly after electroporation, cells have been transduced with AAV6 carrying the GFP or CD19-CAR transgene flanked by the homology arms to the TRAC locus. **A)** Frequency of GFP positive cells in the T cell population after delivery of either Pin-point or nCas9-UGI-UGI mRNA and transduction with the AAV6-GFP in two donors. **B)** Frequency of CD19-CAR positive cells in the T cell population after delivery of either Pin-point or nCas9-UGI-UGI mRNA and transduction with the AAV6-CAR in two donors. **C)** Quantification of translocations due to dual nicking using Capture-seq. Pin-point mRNAs (nCas9-UGI-UGI and rAPOBEC1-MCP) were delivered with three aptamer-containing sgRNAs targeting B2M, CD52 and PDCD1 loci for base-editing in combination with two paired aptamer-less gRNAs targeting the TRAC locus. SpCas9

mRNA was delivered with three sgRNAs targeting B2M, CD52 and PDCD1 loci in combination with one of the two paired gRNAs targeting the TRAC locus. Control is mock electroporated T cells without RNA. Samples were analysed three days post electroporation. n=2 independent T cell donors. D) Quantification of homology-independent integration of AAV donor ITR sequence at sgRNA target loci. Pin-point mRNAs (nCas9-UGI-UGI and rAPOBEC1-MCP) were delivered with three aptamer-containing sgRNAs targeting B2M, CD52 and PDCD1 loci for base-editing in combination with two paired aptamer-less gRNAs targeting the TRAC locus. SpCas9 mRNA was delivered with three sgRNAs targeting B2M, CD52 and PDCD1 loci in combination with either one of the two paired gRNAs targeting the TRAC locus. Control is mock electroporated T cells without RNA. Shortly after electroporation, cells were transduced with AAV6 carrying the CD19-CAR transgene flanked by sequence homologous to the TRAC locus. Samples were analysed fourteen days post electroporation. n=2 independent T cell donors. Results for the two spCas9 gRNAs targeting TRAC are pooled. For C and D translocation frequency is represented by the percentage of Capture-seq sequencing reads marked as translocations by the DRAGEN Structural Variant (SV) Caller mapping to each sgRNA target site.

PKKKRKVDKKYSIGLAIGTNSVGWAVITDEYKVPSSKKFKVLGNTDRHSIKKNLIGALLFDSGET  
AEATRLKRTARRRYTRRKNRICYLQEIFSNEMAKVDDSFHRLLEESFLVEEDKKHERHPIFGNIV  
DEVAYHEKYPTIYHLRKKLV DSTDKADLR LIYLALAHMIKFRGHFLIEGDLNPDNSDVKLFIQ  
LVQTYNQLFEENPINASGVDAKAILSARLSKSRLENLIAQLPGEKKNGLFGNLIALSLGLTPNF  
KSNFDLAEDAQLQSKD TYDDDLDNLLAQIGDQYADLFLAAKNLSDAILLSDILRVNTEITKAP  
LSASMIKRYDEHHQDLTLLKALVRQQLPEKYKEIFFDQSKNGYAGYIDGGASQEEFYKFIKPILE  
KMDGTEELLV KLNREDLLRKQRTFDNGSIPHQIHLGELHAILRRQEDFY PFLKDNREKIEKILTF  
RIPYYVGPLARGNSRF AWMTRKSEETITPWNFEVVDK GASAQSFIERM TNFDKNLPNEK VLPK  
HLLYEYFTVYNELTKVKYVTEGMRKPAFLSGEQKKAIVDLLFKTNRK VTVKQLKEDYFKKIE  
CFDSVEISGVEDRFNASLGT YHDLKIIKDKDFLDNEENEDILEDIVLTLTLFEDREMIERLKY  
AHLFDDKVMKQLKRRRYTGWGRLSRKLINGIRDKQSGKTILDFLKSDFANRNF MQLIHDDSL  
TFKEDIQKAQVSGQGDSLHEHIANLAGSPA IKKGILQTVKVVDELVKVMGRHKPENIVIEMARE  
NQTTQKGQKNSRERMKRIE EGikelGSQILKEHPVENTQLQNEKLYLYLQNGRDMYVDQELD  
INRLSDYDVDHIVPQSFLKDDSIDNKVLTRSDKNRGKSDNVPSEEVVKKMKNYWRQLLNAKLI  
TQRKFDNLTKAERGGSEL DKAGFIKRQLVETRQITKHVAQILDSRMNTKYDENDKLIREVKVI  
TLKSKLVSDFRKDFQFYK VREINNYHHAHDAYLNAVVG TALIKKYPKLESEFVYGDYKVYDV  
RKMIKSEQEIGKATAYFFYSNIMNFFKTEITLANGEIRKRPLIETNGETGEIVWDKGRDFATV  
RKVLSMPQVNIVKKTEVQTGGFSKESILPKRNSDKLIARKKDWDPK KYGGFDSPTVAYSVLV  
AKVEKGKSKKLKSVKELLGITIMERS SFEKNPIDFLEAKGYKEVKKDLI IKLPKYSLFELENGRK  
RMLASAGELQKGNELALPSKYVNFLYLASHYEKLGKSPEDNEQKQLFVEQHKHYLDEIIEQISE  
FSKRVLADANLDKVLSA YNKHRDKPIREQAENIIHLFTLTNLGAPAAFKYFDTTIDRKRYTSTK  
EVL DATLIHQ SITGLYETRIDLSQLGGDSGGSGGSGGSTNLSDIIEKETGKQLVIQESILMLPEEVE  
EVIGNKPESDILVHTAYDESTDENVMLLTSDAPEYKPWALVIQDSNGENKIKMLSGGSGGSGGS  
TNLSDIIEKETGKQLVIQESILMLPEEVEEVIGNKPESDILVHTAYDESTDENVMLLTSDAPEYK  
PWALVIQDSNGENKIKMLSGGSKRTADGSEFE PKKKRKV

**Figure S7 Protein sequence of Cas9<sup>D10A</sup>.** Color key: Nuclear Localization Signal (NLS), CAS9<sup>D10A</sup>, UGI.

PKKKRKVSSETGPVAVDPTLRRRIEPHEFEVFFDPREL RKETCLLYEINWGGRHSIWRHTSQNTN  
KHVEVNFIEKFTTERYFCPNTRCSITWFLSWSPCGECSRAITEFLSRYPHVTLFIYIARLYHHADP  
RNRQGLRDLISSGVTIQIMTEQESGYCWRNFVNYS SNEAHWPRYPHLWVRLYVLELYCIILGL  
PPCLNILRRKQPQLTFFTIALQSCHYQRLPPHILWATGLKELKTPLGDTTHTSPPCPAPELLGGPM  
ASNFTQFVLVDNNGGTGDVTVAPSNFANGIAEWISSNSRSQAYKVTCSVRQSSAQNRKYTIKVE  
VPKGAWRSYLN MELTIPIFATNSDCELIVKAMQGLLKDGNPIPSAIAANS GIY

**Figure S8 Protein sequence of rAPOBEC1-MCP.** Color key: NLS, rApobec1, MCP

AACAGCAUAGCAAGUUA AAAUAAGGCUAGUCCGUUAUCAACUUGAAAAAGUGGCACCG  
AGUCGGUGCGCGCAUGAGGAUCACCCAUGUGCUUUUmU\*mU\*U

**Figure S9 Sequence of aptamer containing tracrRNA.** Color key: gRNA scaffold, MS2 aptamer, mN\* nucleotides containing 2'-O-methyl 3'phosphorothioate modifications.

mN\*mN\*NNNNNNNNNNNNNNNNNNNNNGUUUUAGAGCUAGAAAUAGCAAGUUAAAAUAAGG  
CUAGUCCGUUAUCAACUUGAAAAAGUGGCACCGAGUCGGUGCGCGCACAUAGAGGAUCAC  
CCAUGUGCUUUUmU\*mU\*U

**Figure S10 Sequence of aptamer containing sgRNA.** Color key: Spacer sequence, gRNA scaffold, MS2 aptamer, mN\* nucleotides containing 2'-O-methyl 3'phosphorothioate modifications.

mN\*mN\*NNNNNNNNNNNNNNNNNNNNNGUUUUAGAGCUAGAAAUAGCAAGUUAAAAUAAGG  
CUAGUCCGUUAUCAACUUGAAAAAGUGGCACCGAGUCGGUGCUmU\*mU\*U

**Figure S11 Sequence of aptamer-less sgRNA.** Color key: Spacer sequence, gRNA scaffold, mN\* nucleotides containing 2'-O-methyl 3'phosphorothioate modifications.

GACGCTGTGGCTCTGCATGACTCACTAGCACTCTATCACGGCCATATTCTGGCAGGGTCAGT  
GGCTCCAACATAACATTTGTTTGGTACTTTACAGTTTATTAAATAGATGTTTATATGGAGAAG  
CTCTCATTCTTTCTCAGAAGAGCCTGGCTAGGAAGGTGGATGAGGCACCATATTCATTTTG  
CAGGTGAAATTCCTGAGATGTAAGGAGCTGCTGTGACTTGCTCAAGGCCTTATATCGAGTA  
AACGGTAGTGCTGGGGCTTAGACGCAGGTGTTCTGATTTATAGTTCAAACCTCTATCAAT  
GAGAGAGCAATCTCCTGGTAATGTGATAGATTTCCCAACTTAATGCCAACATAACCATAAAC  
CTCCATTCTGCTAATGCCAGCCTAAGTTGGGGAGACCACTCCAGATTCCAAGATGTACA  
GTTTGCTTTGCTGGGCCTTTTTCCCATGCCTGCCTTTACTCTGCCAGAGTTATATTGCTGGGG  
TTTTGAAGAAGATCCTATTAATAAAAAGAATAAGCAGTATTATTAAGTAGCCCTGCATTTT  
AGGTTTCCCTTGAGTGGCAGGCCAGGCCTGGCCGTGAACGTTCACTGAAATCATGGCCTCTT  
GGCCAAGATTGATAGCTTGTGCCTGTCCCTGAGTCCCAGTCCATCACGAGCAGCTGGTTTCT  
AAGATGCTATTTCCCGTATAAAGCATGAGACCGTGACTTGCCAGCCCCACAGAGCCCCGCC  
CTTGTCATCACTGGCATCTGGACTCCAGCCTGGGTTGGGGCAAAGAGGGAAATGAGATCA  
TGTCCTAACCTGATCCTCTTGTAACACAGATATCCAGAACCCTGAACCTGCCGTGTACCAG  
CTGAGAGACTCTAAATCCAGTGACAAGTCTGTCTGCCTAggaagcggagctactaacttcagcctgctgaagca  
ggctggagatgtggaggagaacctggacctATGCTGCTGCTGGTCACATCTCTGCTGCTGTGCGAGCTGCC  
CATCCTGCCTTTCTGCTGATCCCCGACATCCAGATGACCCAGACCACAAGCAGCCTGTCTGC  
CAGCCTGGGCGATAGAGTGACCATCAGCTGTAGAGCCAGCCAGGACATCAGCAAGTACCT  
GAACTGGTATCAGCAAAAGCCCGACGGCACCGTGAAGCTGCTGATCTACCACACCAGCAG  
ACTGCACAGCGGCGTGCCAAGCAGATTTTCTGGCAGCGGCTCTGGCACCGACTACAGCCTG  
ACAATCAGCAACCTGGAACAAGAGGATATCGCTACCTACTTCTGCCAGCAAGGCAACACCC  
TGCCTTACACCTTTGGCGGAGGCACCAAGCTGGAAATCACCGGCTCTACAAGCGGCAGCGG  
CAAACCTGGATCTGGCGAGGGATCTACCAAGGGCGAAGTGAAACTGCAAGAGTCTGGCCC  
TGGACTGGTGGCCCCATCTCAGTCTCTGAGCGTGACCTGTACAGTCAGCGGAGTGTCCCTG  
CCTGATTACGGCGTGTCCCTGGATCAGACAGCCTCCTCGGAAAGGCCTGGAATGGCTGGGAG  
TGATCTGGGGCAGCGAGACAACCTACTACAACAGCGCCCTGAAGTCCCAGGCTGACCATCAT  
CAAGGACAACCTCAAGAGCCAGGTGTTCCCTGAAGATGAACAGCCTGCAGACCGACGACAC  
CGCCATCTACTATTGCGCCAAGCACTACTACTACGGCGGCAGCTACGCGATGGATTATTGG  
GGCCAGGGCACCAGCGTGACCGTTTCTTCTGCCGCCGCTATCGAAGTGATGTACCCTCCTCC  
TTACCTGGACAACGAGAAGTCCAACGGCACCATCATCCACGTGAAGGGCAAGCACCTGTGT  
CCTTCTCCACTGTTCCCCGGACCTAGCAAGCCTTTCTGGGTGCTCGTTGTTGTTGGCGGCGT  
GCTGGCCTGTTACAGCCTGCTGGTTACCGTGGCCTTCATCATCTTTTGGGTCCGAAGCAAGC

GGAGCCGGCTGCTGCACTCCGACTACATGAACATGACCCCTAGACGGCCCGGACCAACCA  
GAAAGCACTACCAGCCTTACGCTCCTCCTAGAGACTTCGCCGCCTACCGGTCCAGAGTGAA  
GTTTCAGCAGATCCGCCGATGCTCCCGCCTATCAGCAGGGCCAAAACCAGCTGTACAACGAG  
CTGAACCTGGGGAGAAGAGAAGAGTACGACGTGCTGGACAAGCGGAGAGGCAGAGATCCT  
GAAATGGGCGGCAAGCCCAGACGGAAGAATCCTCAAGAGGGCCTGTATAATGAGCTGCAG  
AAAGACAAGATGGCCGAGGCCTACAGCGAGATCGGAATGAAGGGCGAGCGCAGAAGAGG  
CAAGGGACACGATGGACTGTACCAGGGACTGAGCACCGCCACCAAGGATACCTATGACGC  
CCTGCACATGCAGGCCCTGCCTCCAAGATAAtgagttaaaccgctgatcagcctcactgtgccttctagtggccagcc  
atctgtgtttgcccctccccgtgccttcctgaccctggaaggtgccactcccactgtcctttcctaataaaatgaggaaattgcatcgcattgtctgagta  
ggtgcattctattctgggggggtgggggtggggcaggacagcaagggggaggattgggaagacaatagcaggcatgctggggatgcggtgggctcta  
tggGATTCTCAAACAAATGTGTCAACAAGTAAGTATTCTGATGTGTATATCACAGACAAAAC  
TGTGCTAGACATGAGGTCTATGGACTTCAAGAGCAACAGTGTGTGGCCTGGAGCAACAAA  
TCTGACTTTGCATGTGCAAACGCCTTCAACAACAGCATTATTCCAGAAGACACCTTCTTCCC  
CAGCCCAGGTAAGGGCAGCTTTGGTGCCCTTCGCAGGCTGTTTCCCTTGCTTCAGGAATGGCC  
AGGTTCTGCCCAGAGCTCTGGTCAATGATGTCTAAACTCCTCTGATTGGTGGTCTCGGCCT  
TATCCATTGCCACCAAAACCCTCTTTTTACTAAGAAACAGTGAGCCTTGTTCTGGCAGTCCA  
GAGAATGACACGGGAAAAAAGCAGATGAAGAGAAGGTGGCAGGAGAGGGCACGTGGCCC  
AGCCTCAGTCTCTCCAAGTTCCTGCCTGCCTTTCCTGCTCAGACTGTTTGCCCCTTAC  
TGCTCTTCTAGGCCTCATTCTAAGCCCCTTCTCCAAGTTGCCTCTCCTTATTTCTCCCTGTCT  
GCCAAAAAATCTTTCCCAGCTCACTAAGTCAGTCTCACGCAGTCACTCATTAAACCCACCAA  
TCACTGATTGTGCCGGCACATGAATGCACCAGGTGTTGAAGTGGAGGAATTA AAAAGT CAG  
ATGAGGGGTGTGCCCAGAGGAAGCACCATTCTAGTTGGGGGAGCCCATCTGTCAGCTGGGA  
AAAGTCAAATAACTTCAGATTGGAATGTGTTTTAACTCAGGGTTGAGAAAACAGCTACCT  
TCAGGACAAAAGTCAGGGAAGGGCTCTCTGAAGAAATGCTACTTGAAGATACCAGCCCTA  
CCAAGGGCAGGGAGAGGACCCTATAGAGGCCTGGGACAGGAGCT

**Figure S12 Sequence of the CAR template.** Color key: NNNNN TRAC homology arms, nnnnnn GSG+P2A, NNNNN 1928Z-CAR, nnnnn bGH poly(A) signal.

**Table S1. Base editing guide RNA information.** crRNAs exhibiting the highest level of target C>T conversion and associated protein loss for each gene are underlined.

| Gene  | spacer sequence (5'-3')         | PAM | Target exon  | Target C position | Base editing outcome | gRNA ID            |
|-------|---------------------------------|-----|--------------|-------------------|----------------------|--------------------|
| B2M   | CACAGCCCAAGATAGTTA<br>AG        | TGG | Exon 2       | 3                 | PTC                  | B2M_Ex2_PTC1_C3    |
| B2M   | ACAGCCCAAGATAGTTAA<br>GT        | GGG | Exon 2       | 2                 | PTC                  | B2M_Ex2_PTC2_C2    |
| B2M   | TTACCCCACTTAACTATCT<br>T        | GGG | Exon 2       | 6, 7              | PTC                  | B2M_Ex2_PTC3_C6    |
| B2M   | CTTACCCCACTTAACTATC<br>T        | TGG | Exon 2       | 7, 8              | PTC                  | B2M_Ex2_PTC4_C7    |
| B2M   | <u>ACTCACGCTGGATAGCCTC</u><br>C | AGG | Exon 1<br>SD | 6                 | SD<br>disruption     | B2M_Ex1_SD_C6      |
| B2M   | TTGGAGTACCTGAGGAAT<br>AT        | CGG | Exon 2<br>SA | 10                | SA<br>disruption     | B2M_Ex2_SA_C10     |
| B2M   | TCGATCTATGAAAAAGAC<br>AG        | TGG | Exon 3<br>SA | 6                 | SA<br>disruption     | B2M_Ex3_SA_C6      |
| B2M   | AACCTGAAAAGAAAAGAA<br>AA        | AGG | Exon 4<br>SA | 4                 | SA<br>disruption     | B2M_Ex4_SA_C4      |
| CD52  | GTACAGGTAAGAGCAACG<br>CC        | TGG | Exon 1       | 4                 | PTC                  | CD52_Ex1_PTC1_C4   |
| CD52  | CTCCTCCTACAGATACAAA<br>C        | TGG | Exon 2       | 16                | PTC                  | CD52_Ex2_PTC2_C16  |
| CD52  | CAGATACAAACTGGACTC<br>TC        | AGG | Exon 2       | 7                 | PTC                  | CD52_Ex2_PTC3_C7   |
| CD52  | <u>CTCTTACCTGTACCATAAC</u><br>C | AGG | Exon 1<br>SD | 7                 | SD<br>disruption     | CD52_Ex1_SD_C7     |
| CD52  | GTATCTGTAGGAGGAGAA<br>GT        | GGG | Exon 2<br>SA | 5                 | SA<br>disruption     | CD52_Ex2_SA_C5     |
| CD52  | TGTATCTGTAGGAGGAGA<br>AG        | TGG | Exon 2<br>SA | 6                 | SA<br>disruption     | CD52_Ex2_SA_C6     |
| CD52  | GTCCAGTTTGTATCTGTAG<br>G        | AGG | Exon 2<br>SA | 14                | SA<br>disruption     | CD52_Ex2_SA_C14    |
| TRAC  | AACAAATGTGTCACAAAG<br>TA        | AGG | Exon 1       | 3                 | PTC                  | TRAC_Ex1_PTC1_C3   |
| TRAC  | CTTCTTCCCCAGCCCAGGT<br>A        | AGG | Exon 1       | 15                | PTC                  | TRAC_Ex1_PTC2_C15  |
| TRAC  | TTCTTCCCCAGCCCAGGTA<br>A        | GGG | Exon 1       | 14                | PTC                  | TRAC_Ex1_PTC3_C14  |
| TRAC  | AGCCCAGGTAAGGGCAGC<br>TT        | TGG | Exon 1       | 5                 | PTC                  | TRAC_Ex1_PTC4_C5   |
| TRAC  | TTTCAAACCTGTCAGTGA<br>T         | TGG | Exon 3       | 4                 | PTC                  | TRAC_Ex3_PTC5_C4   |
| TRAC  | TTCAAACCTGTCAGTGAT<br>T         | GGG | Exon 3       | 3                 | PTC                  | TRAC_Ex3_PTC6_C3   |
| TRAC  | CCGAATCCTCCTCCTGAAA<br>G        | TGG | Exon 3       | 2                 | PTC                  | TRAC_Ex3_PTC7_C2   |
| TRAC  | CTTACCTGGGCTGGGGAA<br>GA        | AGG | Exon 1<br>SD | 5                 | SD<br>disruption     | TRAC_Ex1_SD_C5     |
| TRAC  | <u>TTCGTATCTGTAAAACCAA</u><br>G | AGG | Exon 3<br>SA | 8                 | SA<br>disruption     | TRAC_Ex3_SA_C8     |
| PDCD1 | TCCAGGCATGCAGATCCC<br>AC        | AGG | Exon 1       | 11                | PTC                  | PDCD1_Ex1_PTC1_C11 |



|       |                                 |     |              |                 |                  |                     |
|-------|---------------------------------|-----|--------------|-----------------|------------------|---------------------|
| PDCD1 | TGCAGATCCCACAGGCGC<br>CC        | TGG | Exon 1       | 3               | PTC              | PDCD1_Ex1_PTC2_C3   |
| PDCD1 | CGACTGGCCAGGGCGCCT<br>GT        | GGG | Exon 1       | 8, 9            | PTC              | PDCD1_Ex1_PTC3_C8   |
| PDCD1 | ACGACTGGCCAGGGCGCC<br>TG        | TGG | Exon 1       | 9, 10           | PTC              | PDCD1_Ex1_PTC4_C9   |
| PDCD1 | ACCGCCCAGACGACTGGC<br>CA        | GGG | Exon 1       | 6, 7            | PTC              | PDCD1_Ex1_PTC5_C6   |
| PDCD1 | CACCGCCCAGACGACTGG<br>CC        | AGG | Exon 1       | 7, 8, 19,<br>20 | PTC              | PDCD1_Ex1_PTC6_C7   |
| PDCD1 | TGTAGCACCGCCCAGACG<br>AC        | TGG | Exon 1       | 12, 13          | PTC              | PDCD1_Ex1_PTC7_C12  |
| PDCD1 | GGGCGGTGCTACAACCTGG<br>GC       | TGG | Exon 1       | 12              | PTC              | PDCD1_Ex1_PTC8_C12  |
| PDCD1 | CGGTGCTACAACCTGGGCT<br>GG       | CGG | Exon 1       | 9               | PTC              | PDCD1_Ex1_PTC9_C9   |
| PDCD1 | CTACAACCTGGGCTGGCGG<br>CC       | AGG | Exon 1       | 4               | PTC              | PDCD1_Ex1_PTC10_C4  |
| PDCD1 | CACCTACCTAAGAACCATC<br>C        | TGG | Exon 1       | 15, 16          | PTC              | PDCD1_Ex1_PTC11_C15 |
| PDCD1 | GGGGTTCCAGGGCCTGTCT<br>G        | GGG | Exon 2       | 7, 8            | PTC              | PDCD1_Ex2_PTC12_C8  |
| PDCD1 | GGGGTTCCAGGGCCTGT<br>CT         | GGG | Exon 2       | 8, 9            | PTC              | PDCD1_Ex2_PTC13_C8  |
| PDCD1 | GGGGGGTTCCAGGGCCTG<br>TC        | TGG | Exon 2       | 9, 10           | PTC              | PDCD1_Ex2_PTC14_C9  |
| PDCD1 | CAGCAACCAGACGGACAA<br>GC        | TGG | Exon 2       | 8               | PTC              | PDCD1_Ex2_PTC15_C8  |
| PDCD1 | CCCAGGACCGCAGCCAG<br>CC         | CGG | Exon 2       | 16              | PTC              | PDCD1_Ex2_PTC16_C16 |
| PDCD1 | GGACCGCAGCCAGCCCGG<br>CC        | AGG | Exon 2       | 11              | PTC              | PDCD1_Ex2_PTC17_C11 |
| PDCD1 | CGTGTACACAACCTGCCCA<br>A        | CGG | Exon 2       | 10              | PTC              | PDCD1_Ex2_PTC18_C10 |
| PDCD1 | GTGTACACAACCTGCCCA<br>AC        | GGG | Exon 2       | 9               | PTC              | PDCD1_Ex2_PTC19_C9  |
| PDCD1 | CGCAGATCAAAGAGAGCC<br>TG        | CGG | Exon 2       | 3               | PTC              | PDCD1_Ex2_PTC20_C3  |
| PDCD1 | GCAGATCAAAGAGAGCCT<br>GC        | GGG | Exon 2       | 2               | PTC              | PDCD1_Ex2_PTC21_C2  |
| PDCD1 | <u>CACCTACCTAAGAACCATC</u><br>C | TGG | Exon 1<br>SD | 7               | SD<br>disruption | PDCD1_Ex1_SD_C7     |
| PDCD1 | GGAGTCTGAGAGATGGAG<br>AG        | AGG | Exon 2<br>SA | 6               | SA<br>disruption | PDCD1_Ex2_SA_C6     |
| PDCD1 | TTCTTTGAGGAGAAAGGG<br>AG        | AGG | Exon 5<br>SA | 3               | SA<br>disruption | PDCD1_Ex5_SA_C3     |

**Table S2. CHANGE-seq off-targets nomination.**

The average and individual nuclease read counts (replicates 1-3) for each amplified site are reported, for two human donors evaluated (identified as D71 and D73). Sites selected for rhAmpSeq validation are identified in column L. These sites have been selected based on hierarchical selection criteria (column M) as defined in the table and in methods section. Genomic coordinates and sequence for each amplified site are reported. Mismatches to the on-target site are reported in lowercase.

Provided as separate file.

**Table S3. Summary of rhAmpSeq on-target and off-target editing outcomes in T cells edited with the Pin-point system or SpCas9 for sites predicted by the CHANGESeq off-target discovery.**

Percentage editing in edited samples (raw editing), control samples (control), and corrected editing calculated by subtracting the value of the control sample from the edited sample (background corrected editing), together with matched read depth at each interrogated site. Data is representative of either base editing (BE) or Insertions/Deletions (INDEL) events in cells edited with the Pin-point system (PnP) or SpCas9 for indicated on-target (TRAC/ B2M/ PDCD-1/ CD52) and predicted off-target sites. Bayesian statistics has been performed on the dataset, citing the evidence ratio, posterior probability and \* as measures of statistical significance. On-targets are highlighted in green and validated off-targets in red.

Provided as separate file.

**Table S4: Summary of rhAmpSeq on-target and off-target editing for additional sites with up to four miss-matches.**

Percentage editing in edited samples (raw editing), control samples (control), and corrected editing calculated by subtracting the value of the control sample from the edited sample (background corrected editing), together with matched read depth at each interrogated site. Data is representative of either base editing (BE) or Insertions/Deletions (INDEL) events in cell edited with the Pin-point system (PnP) or SpCas9 for indicated on-target (TRAC/ B2M/ PDCD-1/ CD52) and predicted off-target sites. Bayesian statistics has been performed on the dataset, citing the evidence ratio, posterior probability and \* as measures of statistical significance. On-targets are highlighted in green and validated off-targets in red.

Provided as separate file.

**Table S5. Identity of translocations in 4 target knockout samples.**

Total reads assigned to individual translocation clusters identified by the DRAGEN Structural Variant Caller (MANTA). Read depth at breakpoints on each chromosome (Chr A and Chr B) are shown for translocations involving at least one gRNA target.

Provided as separate file.

**Table S6. Quantification of translocations in 4 target knockout samples**

Total number of reads mapping to intervals +/-1000bp of gRNA target sites on each chromosome (Chr A and Chr B) for groups of translocations involving similar breakpoints. In cases where a breakpoint on either ChrA or ChrB is not adjacent to a captured gRNA target site the total number of reads mapping to the breakpoint is reported. Cluster reads reports the sum of reads supporting each group of translocations.

Provided as separate file.

**Table S7 Quantification of translocations at each target site in 4 target knockout samples**

Total number of reads mapping to intervals +/-1000bp of each gRNA target site. Cluster reads reports the total number of reads assigned to translocation clusters by MANTA mapping within +/-1000bp of each captured gRNA target site.

Provided as separate file.

**Table S8. Lists of downregulated genes in T cells electroporated with Pin-point mRNAs and the 4 targets gRNAs *B2M*, *CD52*, *PDCD1* and *TRAC* or the scramble gRNA**

Provided as separate file.

**Table S9 – Identity of translocations following multi target editing with paired nicking guide RNAs.**

Total reads assigned to individual translocation clusters identified by the DRAGEN Structural Variant Caller (MANTA). Read depth at breakpoints on each chromosome (Chr A and Chr B) are shown for translocations involving at least one gRNA target.

Provided as separate file.

**Table S10 – Quantification of translocations following multi target editing with paired nicking guide RNAs.**

Total number of reads mapping to intervals +/-1000bp of gRNA target sites on each chromosome (Chr A and Chr B) for groups of translocations involving similar breakpoints. In cases where a breakpoint on either ChrA or ChrB is not adjacent to a captured gRNA target site the total number of reads mapping to the breakpoint is reported. Cluster reads reports the sum of reads supporting each group of translocations.

Provided as separate file.

**Table S11 – Quantification of translocations at each target site following multi target editing with paired nicking guide RNAs.**

Total number of reads mapping to intervals +/-1000bp of each gRNA target site. Cluster reads reports the total number of reads assigned to translocation clusters by MANTA mapping within +/-1000bp of each captured gRNA target site.

Provided as separate file.

**Table S12 – Identity of AAV off target integration sites following simultaneous multi target editing and CAR knock-in.**

Total reads assigned to individual clusters identified by the DRAGEN Structural Variant Caller (MANTA). Read depth at AAV ITR integration sites +/-1000bp of captured gRNA targets are shown.

Provided as separate file.

**Table S13 – Quantification of AAV off target integration events following simultaneous multi target editing and CAR knock-in.**

Total number of reads mapping to intervals +/-1000bp of captured gRNA target sites with AAV ITR integrations. Cluster reads reports the sum of reads supporting each integration.

Provided as separate file.

**Table S14. Guide RNAs utilised with SpCas9 optimal for indels formation.**

| Gene  | spacer sequence (5'-3') | PAM | Target exon |
|-------|-------------------------|-----|-------------|
| B2M   | GAGTAGCGCGAGCACAGCTA    | AGG | Exon 1      |
| CD52  | CAGCCTCCTGGTTATGGTAC    | AGG | Exon 1      |
| PDCD1 | CTGCAGCTTCTCCAACACAT    | CGG | Exon2       |
| TRAC  | CAGGGTTCTGGATATCTGT     | GGG | Exon 1      |

**Table S15. Guide RNAs utilized for the knock-in in the TRAC locus.**

| Gene | spacer sequence (5'-3') | PAM | Target exon |
|------|-------------------------|-----|-------------|
| TRAC | GAGAATCAAAATCGGTGAAT    | AGG | Exon 1      |
| TRAC | AACAAATGTGTCACAAAGTA    | AGG | Exon 1      |

**Table S16. Gene specific sequences for primers used for NGS genomic DNA amplification to detect base editing and indel events.**

| Gene  | spacer sequence (5'-3')                | gRNA name           | Forward Primer (5'-3')    | Reverse Primer (5'-3')    |
|-------|----------------------------------------|---------------------|---------------------------|---------------------------|
| B2M   | CACAGCCCAAGATAGTT<br>AAG               | B2M_Ex2_PTC1_C3     | ACTCACGTCATCCAGCA<br>GAGA | TGGGACTCATTTCAGGG<br>TAGT |
| B2M   | ACAGCCCAAGATAGTT<br>AAGT               | B2M_Ex2_PTC2_C2     | ACTCACGTCATCCAGCA<br>GAGA | TGGGACTCATTTCAGGG<br>TAGT |
| B2M   | TTACCCCACTTAACTAT<br>CTT               | B2M_Ex2_PTC3_C6     | ACTCACGTCATCCAGCA<br>GAGA | TGGGACTCATTTCAGGG<br>TAGT |
| B2M   | CTTACCCCACTTAACTA<br>TCT               | B2M_Ex2_PTC4_C7     | ACTCACGTCATCCAGCA<br>GAGA | TGGGACTCATTTCAGGG<br>TAGT |
| B2M   | <u>ACTCACGCTGGATAGCC</u><br><u>TCC</u> | B2M_Ex1_SD_C6       | GGCCTTGTCTGATTGG<br>CTG   | CGTTCCCCGAGATCC<br>AG     |
| B2M   | TTGGAGTACCTGAGGA<br>ATAT               | B2M_Ex2_SA_C10      | AGGTGGAAGCTCATTTG<br>GCC  | ACCAGTCCTTGCTGAA<br>AGAC  |
| B2M   | TCGATCTATGAAAAAG<br>ACAG               | B2M_Ex3_SA_C6       | TCTGAGGCTAGTAGGA<br>AGGGC | TCTCAGGACAGTGA<br>AAAA    |
| B2M   | AACCTGAAAAAGAAAA<br>AAAA               | B2M_Ex4_SA_C4       | GGGAGACCAAAGGGA<br>TACAC  | TAAGTTGCCAGCCCTC<br>CTA   |
| CD52  | GTACAGGTAAGAGCAA<br>CGCC               | CD52_Ex1_PTC1_C4    | AAGCTGCTACCAAGAC<br>AGCC  | CAGGTTTCTTCAGGG<br>CAGC   |
| CD52  | CTCCTCCTACAGATACA<br>AAC               | CD52_Ex2_PTC2_C16   | GAGTTCGAGACCAGCCT<br>GAC  | AGGAAAATGCCTCCG<br>CTTAT  |
| CD52  | CAGATACAAACTGGAC<br>TCTC               | CD52_Ex2_PTC3_C7    | GAGTTCGAGACCAGCCT<br>GAC  | AGGAAAATGCCTCCG<br>CTTAT  |
| CD52  | <u>CTCTTACCTGTACCATA</u><br><u>ACC</u> | CD52_Ex1_SD_C7      | AAGCTGCTACCAAGAC<br>AGCC  | CAGGTTTCTTCAGGG<br>CAGC   |
| CD52  | GTATCTGTAGGAGGAG<br>AAGT               | CD52_Ex2_SA_C5      | GAGTTCGAGACCAGCCT<br>GAC  | AGGAAAATGCCTCCG<br>CTTAT  |
| CD52  | TGTATCTGTAGGAGGAG<br>AAG               | CD52_Ex2_SA_C6      | GAGTTCGAGACCAGCCT<br>GAC  | AGGAAAATGCCTCCG<br>CTTAT  |
| CD52  | GTCCAGTTTGTATCTGT<br>AGG               | CD52_Ex2_SA_C14     | GAGTTCGAGACCAGCCT<br>GAC  | AGGAAAATGCCTCCG<br>CTTAT  |
| TRAC  | AACAAATGTGTCACAA<br>AGTA               | TRAC_Ex1_PTC1_C3    | GCCGTGTACCAGCTGAG<br>AGA  | AAGGCCGAGACCACC<br>AATCA  |
| TRAC  | CTTCTTCCCAGCCCAG<br>GTA                | TRAC_Ex1_PTC2_C15   | GCCGTGTACCAGCTGAG<br>AGA  | AAGGCCGAGACCACC<br>AATCA  |
| TRAC  | TTCTTCCCAGCCCAGG<br>TAA                | TRAC_Ex1_PTC3_C14   | GCCGTGTACCAGCTGAG<br>AGA  | AAGGCCGAGACCACC<br>AATCA  |
| TRAC  | AGCCCAGGTAAGGGCA<br>GCTT               | TRAC_Ex1_PTC4_C5    | GCCGTGTACCAGCTGAG<br>AGA  | AAGGCCGAGACCACC<br>AATCA  |
| TRAC  | TTTCAAAACCTGTCAGT<br>GAT               | TRAC_Ex3_PTC5_C4    | CTGCAAGGGACAGGAG<br>GTG   | CTCACCTCAGCTGGAC<br>CAC   |
| TRAC  | TTCAAAACCTGTCAGTG<br>ATT               | TRAC_Ex3_PTC6_C3    | CTGCAAGGGACAGGAG<br>GTG   | CTCACCTCAGCTGGAC<br>CAC   |
| TRAC  | CCGAATCCTCCTCCTGA<br>AAG               | TRAC_Ex3_PTC7_C2    | CTGCAAGGGACAGGAG<br>GTG   | CTCACCTCAGCTGGAC<br>CAC   |
| TRAC  | CTTACCTGGGCTGGGGA<br>AGA               | TRAC_Ex1_SD_anti_C5 | GCCGTGTACCAGCTGAG<br>AGA  | AAGGCCGAGACCACC<br>AATCA  |
| TRAC  | <u>TTCGTATCTGTAAAACC</u><br><u>AAG</u> | TRAC_Ex3_SA_anti_C8 | GGGGATATGCACAGAA<br>GCTGC | CTCAGAGCTTAGGATG<br>CACCC |
| PDCD1 | TCCAGGCATGCAGATCC<br>CAC               | PDCD1_Ex1_PTC1_C11  | CTGAGCAGTGGAGAAG<br>GCG   | CACACAGCTCAGGGT<br>AAGGG  |
| PDCD1 | TGCAGATCCCACAGGC<br>GCC                | PDCD1_Ex1_PTC2_C3   | CTGAGCAGTGGAGAAG<br>GCG   | CACACAGCTCAGGGT<br>AAGGG  |

|       |                          |                         |                          |                          |
|-------|--------------------------|-------------------------|--------------------------|--------------------------|
| PDCD1 | CGACTGGCCAGGGCGC<br>CTGT | PDCD1_Ex1_PTC3_C<br>8   | CTGAGCAGTGGAGAAG<br>GCG  | CACACAGCTCAGGGT<br>AAGGG |
| PDCD1 | ACGACTGGCCAGGGCG<br>CCTG | PDCD1_Ex1_PTC4_C<br>9   | CTGAGCAGTGGAGAAG<br>GCG  | CACACAGCTCAGGGT<br>AAGGG |
| PDCD1 | ACCGCCCAGACGACTG<br>GCCA | PDCD1_Ex1_PTC5_C<br>6   | CTGAGCAGTGGAGAAG<br>GCG  | CACACAGCTCAGGGT<br>AAGGG |
| PDCD1 | CACCGCCCAGACGACT<br>GGCC | PDCD1_Ex1_PTC6_C<br>7   | CTGAGCAGTGGAGAAG<br>GCG  | CACACAGCTCAGGGT<br>AAGGG |
| PDCD1 | TGTAGCACCGCCCAGAC<br>GAC | PDCD1_Ex1_PTC7_C<br>12  | CTGAGCAGTGGAGAAG<br>GCG  | CACACAGCTCAGGGT<br>AAGGG |
| PDCD1 | GGGCGGTGCTACAAC<br>GGGC  | PDCD1_Ex1_PTC8_C<br>12  | CTGAGCAGTGGAGAAG<br>GCG  | CACACAGCTCAGGGT<br>AAGGG |
| PDCD1 | CGGTGCTACAAC<br>TGG      | PDCD1_Ex1_PTC9_C<br>9   | CTGAGCAGTGGAGAAG<br>GCG  | CACACAGCTCAGGGT<br>AAGGG |
| PDCD1 | CTACAAC<br>GCC           | PDCD1_Ex1_PTC10_C<br>4  | CTGAGCAGTGGAGAAG<br>GCG  | CACACAGCTCAGGGT<br>AAGGG |
| PDCD1 | CACCTACCTAAGAACCA<br>TCC | PDCD1_Ex1_PTC11_C<br>15 | CTGAGCAGTGGAGAAG<br>GCG  | CACACAGCTCAGGGT<br>AAGGG |
| PDCD1 | GGGGTTCCAGGGCCTGT<br>CTG | PDCD1_Ex2_PTC12_C<br>8  | GAAGAGGCTCTGCAGT<br>GGAG | TGGAGAAGCTGCAGG<br>TGAAG |
| PDCD1 | GGGGTTCCAGGGCCT<br>GTCT  | PDCD1_Ex2_PTC13_C<br>8  | GAAGAGGCTCTGCAGT<br>GGAG | TGGAGAAGCTGCAGG<br>TGAAG |
| PDCD1 | GGGGTTCCAGGGCC<br>TGTC   | PDCD1_Ex2_PTC14_C<br>9  | GAAGAGGCTCTGCAGT<br>GGAG | TGGAGAAGCTGCAGG<br>TGAAG |
| PDCD1 | CAGCAACCAGACGGAC<br>AAGC | PDCD1_Ex2_PTC15_C<br>8  | GGGACAACGCCACCTTC<br>A   | CAGGCTCTCTTTGATC<br>TGCG |
| PDCD1 | CCCGAGGACCGCAGCC<br>AGCC | PDCD1_Ex2_PTC16_C<br>16 | GGGACAACGCCACCTTC<br>A   | CAGGCTCTCTTTGATC<br>TGCG |
| PDCD1 | GGACCGCAGCCAGCCC<br>GGCC | PDCD1_Ex2_PTC17_C<br>11 | GGGACAACGCCACCTTC<br>A   | CAGGCTCTCTTTGATC<br>TGCG |
| PDCD1 | CGTGTCACACAAC<br>CAA     | PDCD1_Ex2_PTC18_C<br>10 | GGGACAACGCCACCTTC<br>A   | CAGGCTCTCTTTGATC<br>TGCG |
| PDCD1 | GTGTCACACAAC<br>AAC      | PDCD1_Ex2_PTC19_C<br>9  | GGGACAACGCCACCTTC<br>A   | CAGGCTCTCTTTGATC<br>TGCG |
| PDCD1 | CGCAGATCAAAGAGAG<br>CCTG | PDCD1_Ex2_PTC20_C<br>3  | CAACGGGCGTGACTTCC<br>A   | GAGCTCCTGATCCTGT<br>GCAG |
| PDCD1 | GCAGATCAAAGAGAGC<br>CTGC | PDCD1_Ex2_PTC21_C<br>2  | CAACGGGCGTGACTTCC<br>A   | GAGCTCCTGATCCTGT<br>GCAG |
| PDCD1 | CACCTACCTAAGAACCA<br>TCC | PDCD1_Ex1_SD_C7         | GGCACCCTCCCTTCAAC<br>CT  | CTCCAGACCCCTCGCT<br>CC   |
| PDCD1 | GGAGTCTGAGAGATGG<br>AGAG | PDCD1_Ex2_SA_C6         | GAAGAGGCTCTGCAGT<br>GGAG | TGGAGAAGCTGCAGG<br>TGAAG |
| PDCD1 | TTCTTTGAGGAGAAAGG<br>GAG | PDCD1_Ex5_SA_C3         | GAAGAGGCTCTGCAGT<br>GGAG | TGGAGAAGCTGCAGG<br>TGAAG |

**Table S17. Probes used for Capture-Seq experiments.**

Provided as separate file.

**Table S18. Primers and probes used to detect translocation events by ddPCR**

| Translocation | Primer 1               | Probe                 | Primer 2               |
|---------------|------------------------|-----------------------|------------------------|
| B2M-CD52      | GGGCATTCTGAAGCTG<br>AC | AGAAAGAGAGAGTAGCGGAGC | GAGTCTGGCAGTGGT<br>G   |
| B2M-PDCD1     | GGGCATTCTGAAGCTG<br>AC | CCTTAGCTGTGCTCGCGTACT | AGGGACTGAGGGTGG<br>AAG |

|                     |                             |                                      |                              |
|---------------------|-----------------------------|--------------------------------------|------------------------------|
| B2M-TRAC            | ATGTCTCGCTCCGTGGCC<br>TTAG  | CCTGTCAGTGATTGGGTTCCGAAT<br>CCTCCTCC | CATGAGCAGATTAAA<br>CCCGGCCAC |
| CD52-B2M            | GCCACGAAGATCCTACC<br>AAA    | TTCTCTTCCTCCTACTCACCATC              | GGGAGAGGAAGGACC<br>AGA       |
| CD52-PDCD1          | AGACAGCCACGAAGATC<br>CTA    | TTCTCTTCCTCCTACTCACCATC              | AGGGACTGAGGGTGG<br>AAG       |
| CD52-TRAC           | CCTCTTCCTCCTACTCAC<br>CATCA | AACCTGTGTCAGTGATTG GGTTC             | CATGAGCAGATTAAA<br>CCCGGCCAC |
| PDCD1-B2M           | GGCATGCAGATCCCACA<br>G      | AAGTCACGGAGCGAGAGCAC                 | GGCCACCAAGGAGAA<br>CTTG      |
| PDCD1-CD52          | GGCATGCAGATCCCACA<br>G      | TCTGGGCGGTGCTACAACCTG                | CCTCCATGCCAAGCAA<br>CT       |
| PDCD1-<br>TRAC      | GGCATGCAGATCCCACA<br>G      | CCTGTCAGTGATTGGGTTCCGAAT<br>CCTCCTCC | CATGAGCAGATTAAA<br>CCCGGCCAC |
| TRAC-B2M            | CAGCCTGCTCTGCCTTG           | CATGCAAGCCCATAACCGCTGTG              | AAGTCACGGAGCGAG<br>AGAG      |
| TRAC-CD52           | AAACCGTGGGTGTGTCC           | CTGGGACATGCAAGCCCATAA                | CCTCCATGCCAAGCAA<br>CT       |
| TRAC-<br>PDCD1      | CAGCCTGCTCTGCCTTG           | CATGCAAGCCCATAACCGCTGT               | AGGGACTGAGGGTGG<br>AAG       |
| TRAC-<br>PDCD1_OT1  | CAGCCTGCTCTGCCTTG           | CATGCAAGCCCATAACCGCTGTG              | AGAGAGAGAGACGCA<br>TGGTCAACC |
| B2M-<br>PDCD1_OT1   | GGGCATTCTGAAGCTG<br>AC      | CCTTAGCTGTGCTCGCGCTACT               | AGAGAGAGAGACGCA<br>TGGTCAACC |
| CD52-<br>PDCD1_OT1  | GCCACGAAGATCCTACC<br>AAA    | TTCTCTTCCTCCTACTCACCATC              | AGAGAGAGAGACGCA<br>TGGTCAACC |
| PDCD1-<br>PDCD1_OT1 | GGCATGCAGATCCCACA<br>G      | TCTGGGCGGTGCTACAACCTGG               | AGAGAGAGAGACGCA<br>TGGTCAACC |
| PPIA                | CTCTGAGCACTGGAGAG<br>AAAG   | TAAGGGTTCCTGCTTTCACAGAAT             | TGAAGGGAGCAACCC<br>AAATA     |
